# Supplementary material for: Translational Genomics in Legumes Allowed Placing In Silico 5460 Unigenes on the Pea Functional Map and Identified Candidate Genes in Pisum sativum L
Source: PubMed Central journal article supplement (PMC3276132; doi:10.1534/g3.111.000349), 2011-07-01
Supplement: supp_1.2.93_FigureS1.pdf [file supp_1.2.93_FigureS1.pdf]

**Ps\_LGI**

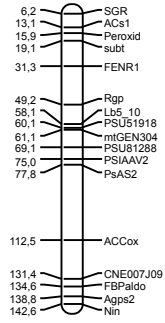

Reversed  
(compared to figure 1)

**Mt\_Chr5**

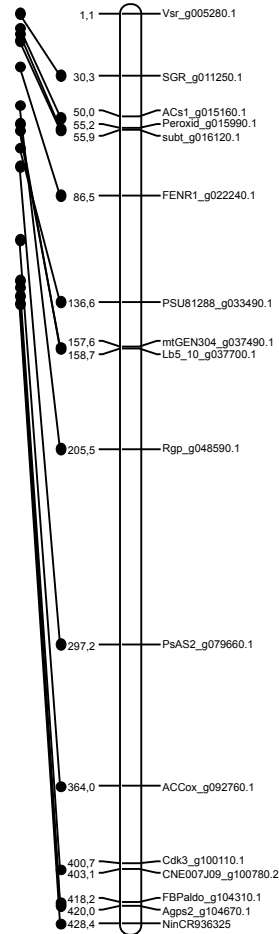

**Ps\_LGII**

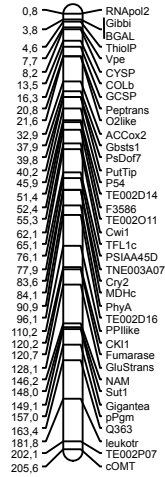

**Mt\_Chr1**

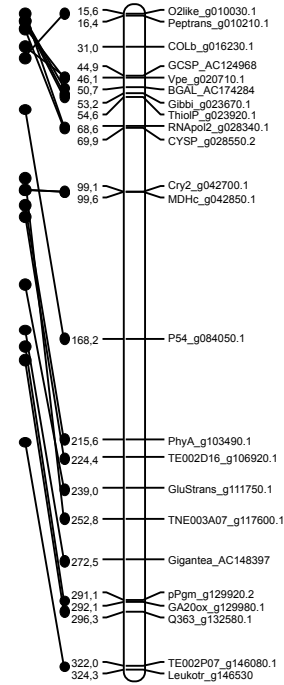

**Ps\_LGIV**

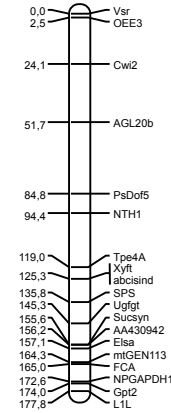

Reversed  
(compared to figure 1)

**Mt\_Chr8**

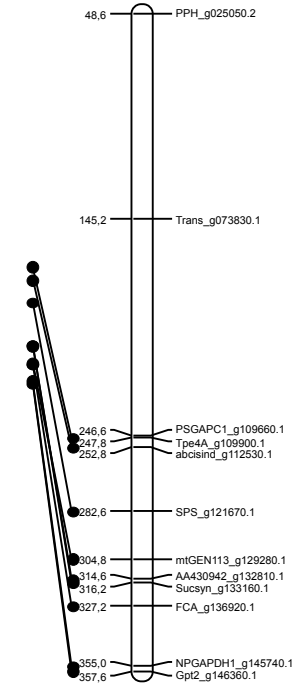

### Mt\_Chr2

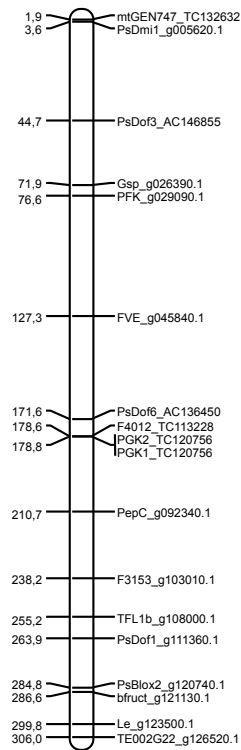

### Ps\_LGIII

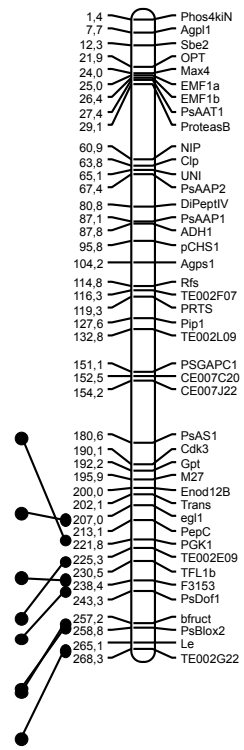

### Mt\_Chr3

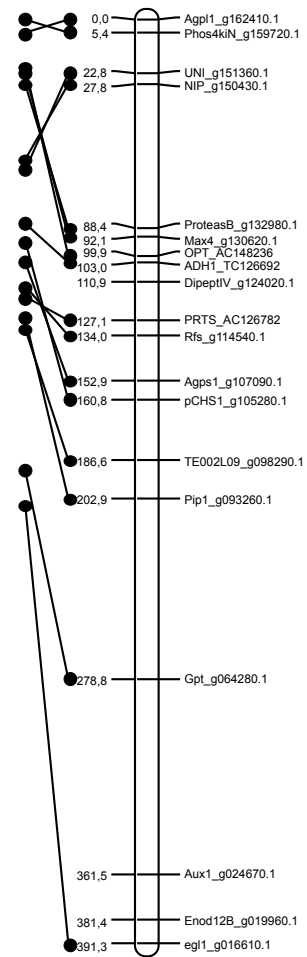

### Ps\_LGV

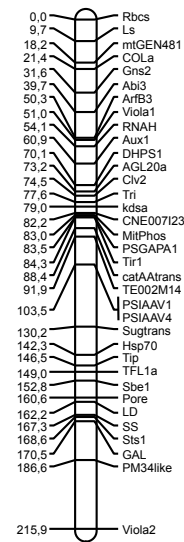

### Mt\_Chr7

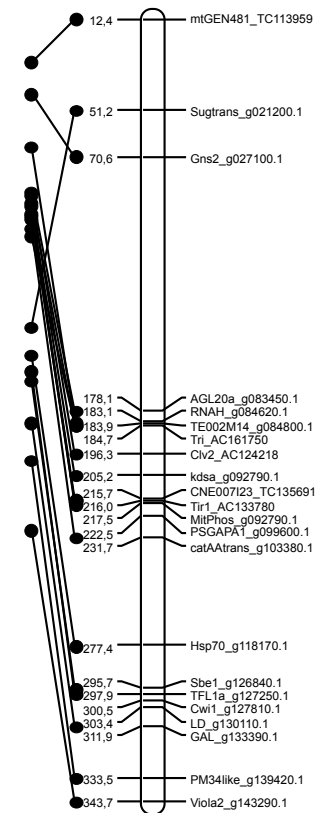

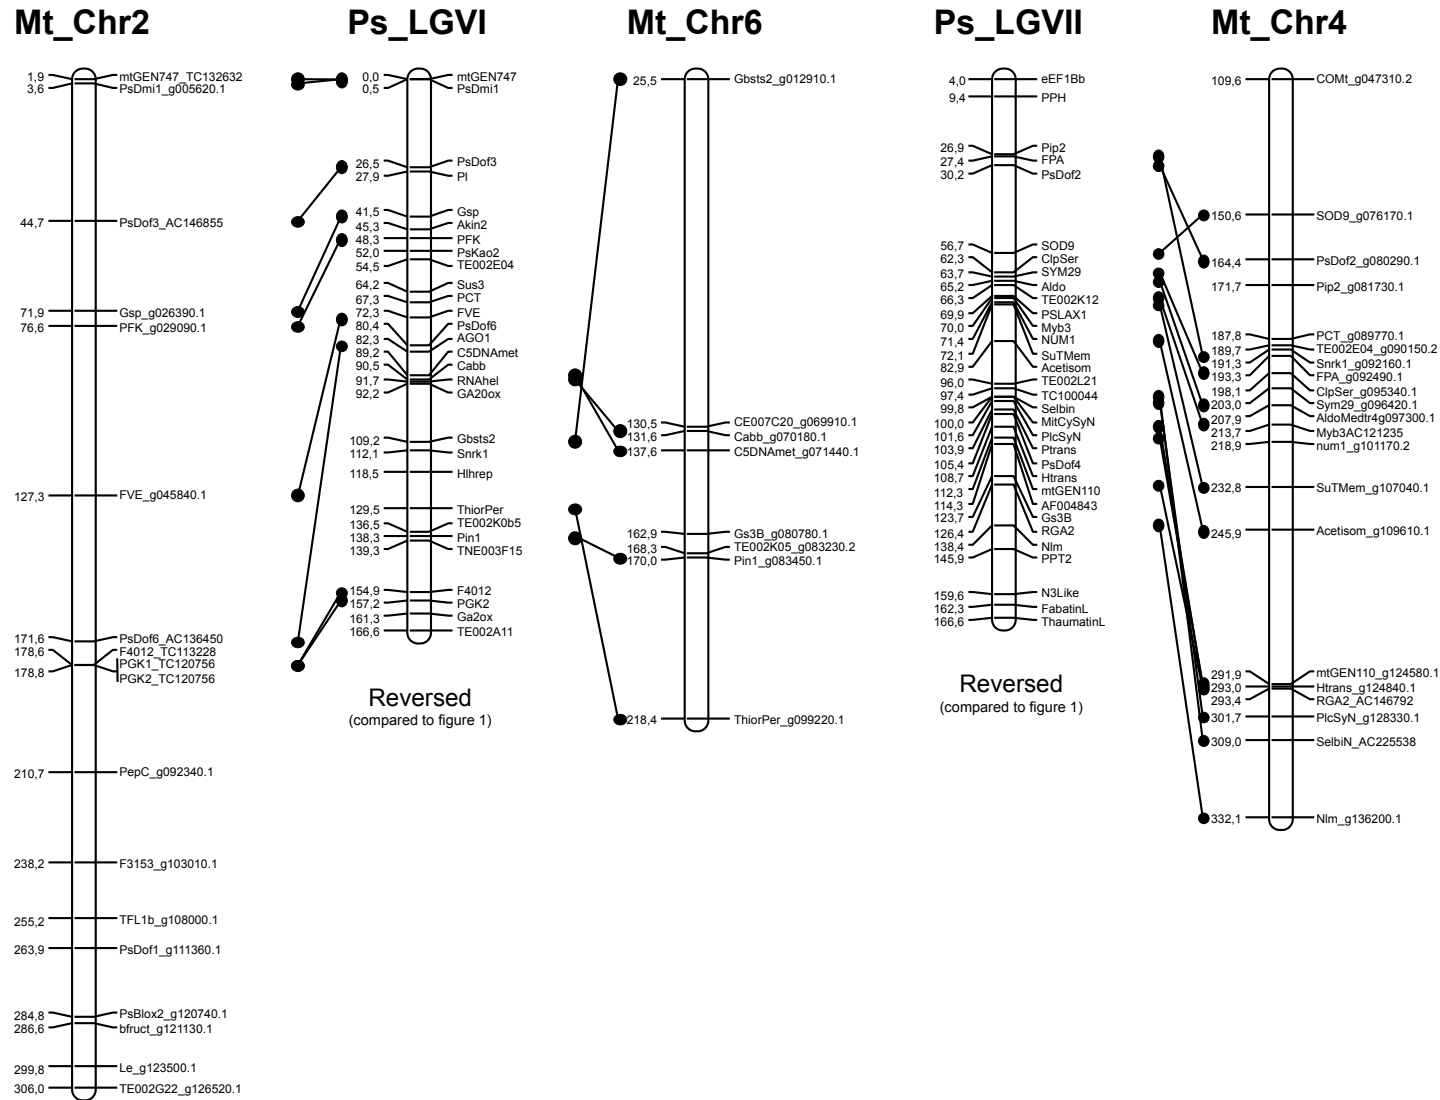

**Figure S1** Comparative maps of *P. sativum* and *M. truncatula*.
