# Supplementary material for: Translational Genomics in Legumes Allowed Placing In Silico 5460 Unigenes on the Pea Functional Map and Identified Candidate Genes in Pisum sativum L
Source: PubMed Central journal article supplement (PMC3276132; doi:10.1534/g3.111.000349), 2011-07-01
Supplement: supp_1.2.93_FileS1.pdf [file supp_1.2.93_FileS1.pdf]

## File S1

Perl script used to find best reciprocal homologues in the two output files of reciprocal BLASTs.

```
#!/usr/bin/perl
#
# Copyright INRA
#
# http://www2.dijon.inra.fr/urleg/
# Vincent Savoie : vincent.savoie@dijon.inra.fr
#

=head1 NAME

get_first_orthologue.pl

=head1 SYNOPSIS

get_first_orthologue.pl blast_output_file homolog_blast_output_file > result.out

=head1 DESCRIPTION

Search the best reciprocal homologues between pea unigenes and sequences
from another species from two outputs of reciprocal Blasts : the database
of the first (-d) is the input file of the other (-i) and reciprocally.

Mandatory : the 2 file names of the reciprocal outputs.
Standard output is the standard output (display) : please redirect to a file.
Output file present a summary of the blast outputs : one line per reciprocal couple.

=head1 SUBROUTINES

=cut

# library
use Bio::SearchIO;

MAIN:
{
    # arguments
    my $usage = "get_first_orthologue.pl blast_output_file homolog_blast_output_file";
    my $blastfile = shift;
    my $homologBlastfile = shift;

    my $searchio = new Bio::SearchIO ( -file => $blastfile, -format => 'blast' );
    my $reci_searchio = new Bio::SearchIO ( -file => $homologBlastfile, -format => 'blast' );
    my %recis;

    while (my $reci_result = $reci_searchio->next_result)
    {
        if (my $shit = &sort_result($reci_result))
        {
            # stores only best reciprocal hits
            $recis{$reci_result->query_name}=$shit;
        }
    }

    print "requete\tthit\treq reciproque\tthit reciproque\tdescription\tdescription reciproque\tscore hit\tscore reciproque\tte-
value hit\tte-value hit reciproque\n";

    #goes through the orthologues (direct sense)
    while (my $result=$searchio->next_result)
```

```

{
  #takes only the hit we want : the best one
  if (my $hit=&sort_result($result))
  {
    my $flag=0;
    my $uneLigne;

    #every time, goes through all the hash of the reciprocals
    while (my ($reci_name, $reci_hit)= each %recis)
    {
      #the comparaison is based on the names
      if (($hit->name eq $reci_name) && ($result->query_name eq $reci_hit->name))
      {
        if (my $hsp = $hit->next_hsp)
        {
          if (my $reci_hsp = $reci_hit->next_hsp)
          {
            if ($reci_hsp->percent_identity > 70 && $hsp->percent_identity > 70)
            {
              $flag++;
              $uneLigne = $result->query_name."\t".$hit-
>name."\t".$reci_name."\t".$reci_hit->name."\t".$hit->description."\t".$reci_hit->description."\t".$hit-
>score."\t".$reci_hit->score."\t".$hit->significance."\t".$reci_hit->significance;
              $uneLigne = $uneLigne."\thsp\trank\t".$hsp->rank."\tident\t".$hsp-
>percent_identity."\tlength\t".$hsp->hsp_length;
              $uneLigne = $uneLigne."\treci hsp\trank\t".$reci_hsp->rank."\tident\t".$reci_hsp-
>percent_identity."\tlength\t".$reci_hsp->hsp_length."\n";
            }
          }
        }
      }
    }

    if ($flag == 1)
    {
      print $uneLigne;
    }
  }
}

```

=head2

```

Title    : sort_result
Usage    : my $hit = &sort_result($result)
Prerequisite : my $result=$searchio->next_result
Function  : Sort hits in function of the bits value
Returns  : the best hit
Args     : SearchIO, next_result object

```

=cut

```

sub sort_result
{
  my $result = shift;
  my @hits;

  while (my $hit = $result->next_hit())
  {
    push @hits, $hit;
  }
  # sort by bits
  my @hits_sort = sort { $a->bits <=> $b->bits } @hits;
}

```

```
$result->rewind;

my $flag=0;
my $temp_hit;
while (my $hit = $result->next_hit())
{
    if ($flag ==0)
    {
        $temp_hit=$hit;
        $flag++;
    }
}
return $temp_hit;
}
```
