# Supplementary material for: Translational Genomics in Legumes Allowed Placing In Silico 5460 Unigenes on the Pea Functional Map and Identified Candidate Genes in Pisum sativum L
Source: PubMed Central journal article supplement (PMC3276132; doi:10.1534/g3.111.000349), 2011-07-01
Supplement: supp_1.2.93_TableS1.pdf [file supp_1.2.93_TableS1.pdf]

**Table S1 Summary of recombinant inbred lines population data for the consensus mapping procedure.** Population code, Number of recombinant lines used in this study, number of markers genotyped, including gene markers, and SSR markers.

| Pop. Code | N. Lines | N. Markers | Gene Mk | SSR Mk | Associated references*                                                           |
|-----------|----------|------------|---------|--------|----------------------------------------------------------------------------------|
| Pop1      | 139      | 274        | 74      | 73     | Laucou et al. 1998, Loridon et al. 2005, Aubert et al. 2006, Burstin et al. 2007 |
| Pop2      | 164      | 197        | 59      | 86     | Loridon et al. 2005, Aubert et al. 2007, Lejeune-Hénaut et al. 2008              |
| Pop3      | 211      | 198        | 79      | 117    | Bourgeois et al. 2011                                                            |
| Pop4      | 207      | 176        | 63      | 112    | Bourion et al. 2010, Bourgeois et al. 2011                                       |
| Pop5      | 211      | 191        | 77      | 111    | Bourgeois et al. 2011                                                            |
| Pop9      | 90       | 92         | 92      | 0      | Deulvot et al. 2010                                                              |

\*Associated references: Aubert et al., 2006, *Theor. Appl. Genet.* 112: 1024-1041; Bourgeois et al. 2011 *Proteomics* in press; Bourion et al. *Theor. Appl. Genet.* 2010, 121: 71-86; Burstin et al., 2007, *Plant Physiology*. 144: 768-781; Deulvot et al., 2010, *BMC Genomics* 11: 468; Laucou et al., 1998, *Theor. Appl. Genet.* 97: 905-915; Loridon et al., 2005, *Theor. Appl. Genet.* 111, 6: 1022-1031.
